# Supplementary material for: EpiDBase: a manually curated database for small molecule modulators of epigenetic landscape
Source: Oxford University Press journal article supplement (doi:10.1093/database/bav013), 2015-01-01
Supplement: bav013_Supplementary_Data.zip [file bav013_Supplementary_Data.zip]

## Bin cluster size of 1

| 1                                                                                  | 2                                                                                   | 3                                                                                   | 4                                                                                    | 5                                                                                     |
|------------------------------------------------------------------------------------|-------------------------------------------------------------------------------------|-------------------------------------------------------------------------------------|--------------------------------------------------------------------------------------|---------------------------------------------------------------------------------------|
| 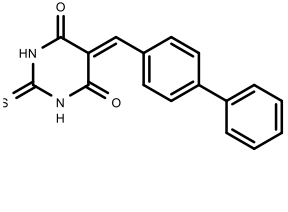   |    |    |    |    |
| Thiobarbiturate<br>s_derivative1_2<br>5.mol                                        | Thiobarbiturate<br>s_derivative1_1<br>1.mol                                         | Thiobarbiturat<br>es_derivative1<br>10.mol                                          | Thioacetylated_<br>peptide_derivat<br>ive 22.mol                                     | Thioacetylated<br>_peptide_deriv<br>ative 20.mol                                      |
| 6                                                                                  | 7                                                                                   | 8                                                                                   | 9                                                                                    | 10                                                                                    |
|    |    |    |    |    |
| Thioacetylated_<br>peptide_derivat<br>ive 18.mol                                   | 71654838 Thieno<br>_pyrimidine_car<br>boxamide analog                               | 71654770 Thien<br>o pyrimidine_c<br>arboxamide ana                                  | Tenovin_derivat<br>ive1_15.mol                                                       | Tenovin_6.mol                                                                         |
| 11                                                                                 | 12                                                                                  | 13                                                                                  | 14                                                                                   | 15                                                                                    |
|  |  |  |  |  |
| Tenovin_4.mol                                                                      | Untitled Docume<br>nt-5 SYN1773930<br>3.mol                                         | Untitled Docum<br>ent-16 SYN1036<br>6754.mol                                        | Suramin_analogu<br>e_NF770.mol                                                       | Suramin_analog<br>ue_NF769.mol                                                        |
| 16                                                                                 | 17                                                                                  | 18                                                                                  | 19                                                                                   | 20                                                                                    |
|  |  |  |  |  |
| Suramin_analogu<br>e_NF763.mol                                                     | Suramin_analogu<br>e_NF669.mol                                                      | Suramin_analog<br>ue_NF451.mol                                                      | Suramin_analogu<br>e_NF343.mol                                                       | Suramin_analog<br>ue_NF136.mol                                                        |

| 21                                                                                 | 22                                                                                  | 23                                                                                  | 24                                                                                   | 25                                                                                    |
|------------------------------------------------------------------------------------|-------------------------------------------------------------------------------------|-------------------------------------------------------------------------------------|--------------------------------------------------------------------------------------|---------------------------------------------------------------------------------------|
| 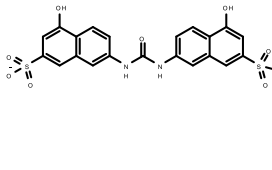   |    |    |    |    |
| Suramin_analogu<br>e_AMI_1.mol                                                     | Splitomicin_rel<br>ated_21.mol                                                      | Splitomicin_re<br>lated_20.mol                                                      | splitomicin_der<br>v_16.mol                                                          | Oxindole.mol                                                                          |
| 26                                                                                 | 27                                                                                  | 28                                                                                  | 29                                                                                   | 30                                                                                    |
|    |    |    |    |    |
| Nicotinamide.mo<br>l                                                               | HKK(thioacyl)L<br>M.mol KK_thioac<br>eyl L.mol                                      | K_thioacyl_A_<br>derv_6.mol K_t<br>hioacyl A der                                    | Ac_PK(thioacyl<br>)A.mol K_thioac<br>eyl A derv 1.mo                                 | AK(thioacyl)A<br>.mol K_thioace<br>yl A.mol                                           |
| 31                                                                                 | 32                                                                                  | 33                                                                                  | 34                                                                                   | 35                                                                                    |
|  |  |  |  |  |
| JGB1741.mol                                                                        | 2_aminosuberic_<br>acid_derv_2_rac<br>.mol hydroxymet                               | hydroxybenzylideneamino_derv<br>.mol                                                | Guttiferone G.m<br>ol                                                                | hydroxymethyl_<br>phenol_derv_1.<br>mol etrahydron                                    |
| 36                                                                                 | 37                                                                                  | 38                                                                                  | 39                                                                                   | 40                                                                                    |
|  |  |  |  |  |
| Dihydropyridine<br>s_derivative1_3<br>5c.mol                                       | Dihydropyridine<br>s_derivative1_3<br>4c.mol                                        | Chroman_4_one_<br>derivative_3a.<br>mol Chromone d                                  | Chroman_4_one_d<br>erivative_1p.mo<br>l                                              | Chroman_4_one_<br>derivative_1o.<br>mol                                               |

| 41                                                    | 42                                                    | 43                                                 | 44                                                  | 45                                                |
|-------------------------------------------------------|-------------------------------------------------------|----------------------------------------------------|-----------------------------------------------------|---------------------------------------------------|
|                                                       |                                                       |                                                    |                                                     |                                                   |
| Chroman_4_one_d<br>erivative_1m.mo<br>l Chroman 4 one | Chroman_4_one_d<br>erivative_1l.mo<br>l Chroman 4 one | Cbz_K_thioacey<br>l_derv_1.mol C<br>bz K thioaceyl | piperidine_carb<br>oxamide.mol bis<br>hydroxyphenyl | benzene_1_4_di<br>amine_derv_12.<br>mol           |
| 46                                                    | 47                                                    | 48                                                 | 49                                                  | 50                                                |
|                                                       |                                                       |                                                    |                                                     |                                                   |
| benzene_1_4_dia<br>mine_derv_11.mo<br>l               | benzene_1_4_dia<br>mine_derv_10.mo<br>l               | Untitled Docum<br>ent-9 BAS13555<br>470.mol        | Untitled Docume<br>nt-17 BAS004175<br>31.mol        | Arylideneindol<br>inone_based_In<br>hibitor 9.mol |
| 51                                                    | 52                                                    | 53                                                 | 54                                                  | 55                                                |
|                                                       |                                                       |                                                    |                                                     |                                                   |
| Anilinobenzamid<br>e_derivative1_3<br>1.mol           | Anilinobenzamid<br>e_derivative1_3<br>0.mol           | 2130404 AGK2.m<br>ol                               | Adenosine_mimet<br>ics_15b.mol                      | Adenosine_mime<br>tics_14b.mol                    |
| 56                                                    | 57                                                    | 58                                                 | 59                                                  | 60                                                |
|                                                       |                                                       |                                                    |                                                     |                                                   |
| Adenosine_mimet<br>ics_14a.mol                        | Adenosine_mimet<br>ics_12d.mol                        | Adenosine_mime<br>tics_12c.mol                     | ACY1215.mol                                         | Acetyl_N_thioa<br>cetyl_lysin.m<br>ol             |

### Bin cluster size of 1

| 61                                                                               | 62                                                                               | 63                                                                                | 64                                                                                 | 65                                                                                  |
|----------------------------------------------------------------------------------|----------------------------------------------------------------------------------|-----------------------------------------------------------------------------------|------------------------------------------------------------------------------------|-------------------------------------------------------------------------------------|
| 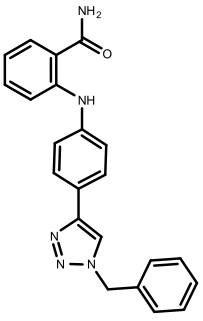 |  |  |  |  |
| A1B11.mol A2B57<br>.mol                                                          | Untitled Docume<br>nt-1 A1B11.mol                                                | 2_amino_phenyl<br>ethyl_benzamid<br>e.mol 4 methox                                | iBET.mol 2_hydr<br>oxy_1_napthalde<br>hyde.mol                                     | 2_hydroxy_1_na<br>pthaldehyde.mo<br>l 2 amino phen                                  |
|                                                                                  |                                                                                  |                                                                                   |                                                                                    |                                                                                     |
|                                                                                  |                                                                                  |                                                                                   |                                                                                    |                                                                                     |
|                                                                                  |                                                                                  |                                                                                   |                                                                                    |                                                                                     |
|                                                                                  |                                                                                  |                                                                                   |                                                                                    |                                                                                     |



| 1                                                                                  | 2                                                                                   | 3                                                                                    | 4                                                                                     |
|------------------------------------------------------------------------------------|-------------------------------------------------------------------------------------|--------------------------------------------------------------------------------------|---------------------------------------------------------------------------------------|
| 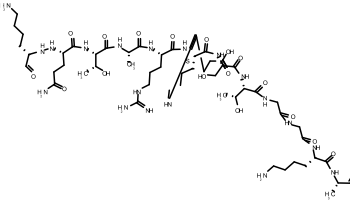   |    |    |    |
| Thiosuccinyl peptide 1_H3K9TSu.mol                                                 | Thiobarbiturates_derivative1_31.mol                                                 | Thiobarbiturates_derivative1_30.mol                                                  | Thioacetylated_peptide_derivative6.mol                                                |
| 5                                                                                  | 6                                                                                   | 7                                                                                    | 8                                                                                     |
|    |    |    |    |
| Thioacetylated_peptide_derivative2.mol                                             | Suramin_analogue_N F762.mol                                                         | Suramin_analogue_N F444.mol                                                          | Suramin_analogue_N F443.mol                                                           |
| 9                                                                                  | 10                                                                                  | 11                                                                                   | 12                                                                                    |
|  |  |  |  |
| Suramin_analogue_N F290.mol                                                        | Suramin_analogue_N F155.mol                                                         | Suramin_analogue_N F154.mol                                                          | Hyperforin.mol                                                                        |
| 13                                                                                 | 14                                                                                  | 15                                                                                   | 16                                                                                    |
|  |  |  |  |
| Hydroxyphenethylaminoanthracene.mol                                                | H3K9TAc.mol                                                                         | dihydroanthracene dione.mol                                                          | Aristoforin.mol                                                                       |

|                                                                                               |                                                                                               |                                                                                                |                                                                                                 |
|-----------------------------------------------------------------------------------------------|-----------------------------------------------------------------------------------------------|------------------------------------------------------------------------------------------------|-------------------------------------------------------------------------------------------------|
| <p>17</p> 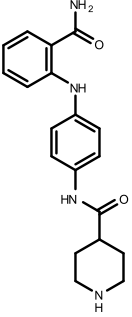   | <p>18</p>    | <p>19</p>    | <p>20</p>    |
| <p>Anilinobenzamide_d<br/>erivative1_18.mol</p>                                               | <p>Anilinobenzamide_d<br/>erivative1_17.mol</p>                                               | <p>Anilinobenzamide_d<br/>erivative1_7p.mol</p>                                                | <p>Anilinobenzamide_d<br/>erivative1_7d.mol</p>                                                 |
| <p>21</p>     | <p>22</p>    | <p>23</p>    | <p>24</p>    |
| <p>Adenosine_mimetics<br/>_15c.mol</p>                                                        | <p>Adenosine_mimetics<br/>_15a.mol</p>                                                        | <p>Adenosine_mimetics<br/>_12m.mol</p>                                                         | <p>Adenosine_mimetics<br/>_12k.mol</p>                                                          |
| <p>25</p>  | <p>26</p>  | <p>27</p>  | <p>28</p>  |
| <p>8_phenyl_AMP.mol</p>                                                                       | <p>8_phenyl_adenosine<br/>.mol</p>                                                            | <p>8_bromo_AMP.mol</p>                                                                         | <p>8_bromo_adenosine.<br/>mol</p>                                                               |
|                                                                                               |                                                                                               |                                                                                                |                                                                                                 |

| 1                                                                                  | 2                                                                                    | 3                                                                                     |
|------------------------------------------------------------------------------------|--------------------------------------------------------------------------------------|---------------------------------------------------------------------------------------|
| 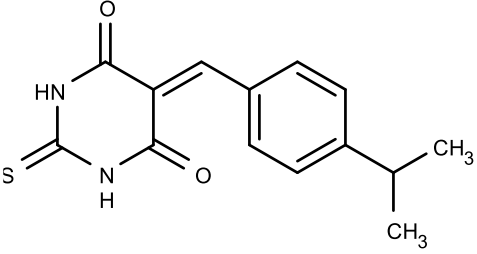   |    |    |
| Thiobarbiturates_derivative1_29.mol                                                | Thiobarbiturates_derivative1_28.mol                                                  | Thiobarbiturates_derivative1_27.mol                                                   |
| 4                                                                                  | 5                                                                                    | 6                                                                                     |
|    |    |    |
| Thiobarbiturates_derivative1_8.mol                                                 | Thiobarbiturates_derivative1_7.mol                                                   | Thiobarbiturates_derivative1_5.mol                                                    |
| 7                                                                                  | 8                                                                                    | 9                                                                                     |
|  |  |  |
| Thioacetylated_peptide_derivative_40.mol                                           | Thioacetylated_peptide_derivative_21.mol                                             | Thioacetylated_peptide_derivative_17.mol                                              |
| 10                                                                                 | 11                                                                                   | 12                                                                                    |
|  |  |  |
| 71654914 Thieno_pyrimidine_carboxamide_analog_35.mol                               | 71654913 Thieno_pyrimidine_carboxamide_analog_34.mol                                 | 71654912 Thieno_pyrimidine_carboxamide_analog_33.mol                                  |

| 13                                                                                  | 14                                                                                  | 15                                                                                    |
|-------------------------------------------------------------------------------------|-------------------------------------------------------------------------------------|---------------------------------------------------------------------------------------|
| 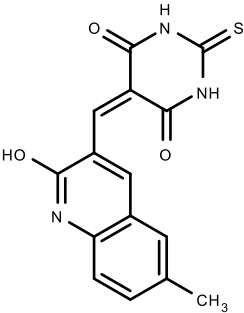   |   |    |
| Tenovin_derivative1_16.mol<br>1                                                     | Suramin_analogue_NF675.mol<br>1                                                     | Suramin_analogue_NF674.mol<br>1                                                       |
| 16                                                                                  | 17                                                                                  | 18                                                                                    |
|     |    |    |
| Suramin_analogue_NF342.mol<br>1                                                     | chromone_derv_2.mol chromone_derv_3.mol                                             | chromone_derv_1.mol chromone_derv_2.mol                                               |
| 19                                                                                  | 20                                                                                  | 21                                                                                    |
|  |  |  |
| dimethoxy_quinaoline_derv_25.mol chromone_derv_1.mol                                | BIM-9 BIM_9.mol                                                                     | Adenosine_mimetics_12j.mol<br>1                                                       |

| 1                                                                                  | 2                                                                                   | 3                                                                                    | 4                                                                                     |
|------------------------------------------------------------------------------------|-------------------------------------------------------------------------------------|--------------------------------------------------------------------------------------|---------------------------------------------------------------------------------------|
| 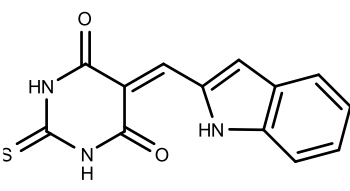   |    |    |    |
| Thiobarbiturates_d<br>erivative1 26.mol                                            | Thiobarbiturates_d<br>erivative1 9.mol                                              | Tenovin_derivative<br>1 18.mol                                                       | Tenovin_derivative<br>1 17.mol                                                        |
| 5                                                                                  | 6                                                                                   | 7                                                                                    | 8                                                                                     |
|   |   |   |   |
| Tenovin_5.mol                                                                      | Tenovin_3.mol                                                                       | Tenovin_2.mol                                                                        | Tenovin_1.mol                                                                         |
| 9                                                                                  | 10                                                                                  | 11                                                                                   | 12                                                                                    |
|  |  |  |  |
| Adenosine_mimetics<br>12i.mol                                                      | Adenosine_mimetics<br>12h.mol                                                       | Adenosine_mimetics<br>12b.mol                                                        | Adenosine_mimetics<br>12a.mol                                                         |

| 1                                                                                                                                                                                                                                                                                                              | 2                                                                                                                                                                                                                                                                                                                 | 3                                                                                                                                                                                                                                                                                                                  |
|----------------------------------------------------------------------------------------------------------------------------------------------------------------------------------------------------------------------------------------------------------------------------------------------------------------|-------------------------------------------------------------------------------------------------------------------------------------------------------------------------------------------------------------------------------------------------------------------------------------------------------------------|--------------------------------------------------------------------------------------------------------------------------------------------------------------------------------------------------------------------------------------------------------------------------------------------------------------------|
| 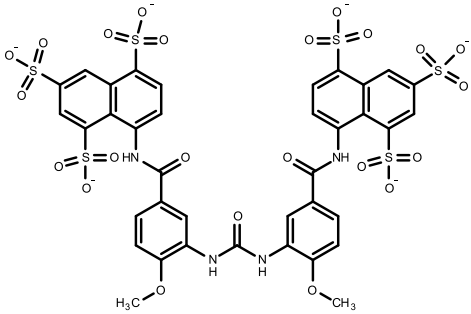 <p>Chemical structure of Suramin analogue NF259. It features two naphthalene-2,6-disulfonate groups linked by a central urea bridge. The naphthalene rings are substituted with methoxy groups at the 1 and 8 positions.</p>  |  <p>Chemical structure of Suramin analogue NF156. It features two naphthalene-2,6-disulfonate groups linked by a central urea bridge. The naphthalene rings are substituted with fluorine atoms at the 1 and 8 positions.</p>   |  <p>Chemical structure of Suramin analogue NF150. It features two naphthalene-2,6-disulfonate groups linked by a central urea bridge. The naphthalene rings are substituted with isopropyl groups at the 1 and 8 positions.</p> |
| Suramin_analogue_NF259.mo<br>1                                                                                                                                                                                                                                                                                 | Suramin_analogue_NF156.mo<br>1                                                                                                                                                                                                                                                                                    | Suramin_analogue_NF150.mo<br>1                                                                                                                                                                                                                                                                                     |
| 4                                                                                                                                                                                                                                                                                                              | 5                                                                                                                                                                                                                                                                                                                 |                                                                                                                                                                                                                                                                                                                    |
|  <p>Chemical structure of Suramin analogue NF058. It features two naphthalene-2,6-disulfonate groups linked by a central urea bridge. The naphthalene rings are substituted with methyl groups at the 1 and 8 positions.</p> |  <p>Chemical structure of Suramin analogue NF023. It features two naphthalene-2,6-disulfonate groups linked by a central urea bridge. The naphthalene rings are substituted with hydrogen atoms at the 1 and 8 positions.</p> |                                                                                                                                                                                                                                                                                                                    |
| Suramin_analogue_NF058.mo<br>1                                                                                                                                                                                                                                                                                 | Suramin_analogue_NF023.mo<br>1                                                                                                                                                                                                                                                                                    |                                                                                                                                                                                                                                                                                                                    |

|                                                                                              |                                                                                                |                                                                                                 |
|----------------------------------------------------------------------------------------------|------------------------------------------------------------------------------------------------|-------------------------------------------------------------------------------------------------|
| <p>1</p> 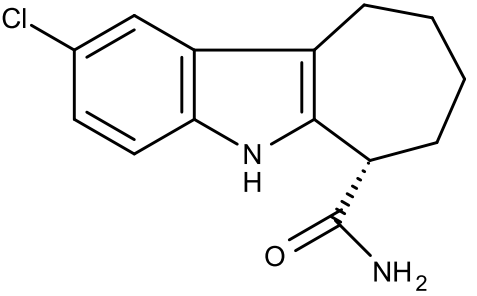    | <p>2</p>     | <p>3</p>     |
| <p>Thiobarbiturates_derivative_4.mol</p>                                                     | <p>Tetrahydrocarbazole_derivative_35.mol</p>                                                   | <p>Tetrahydrocarbazole_derivative_3.mol</p>                                                     |
| <p>4</p>     | <p>5</p>     | <p>6</p>     |
| <p>Tetrahydrocarbazole_derivative_2.mol</p>                                                  | <p>Tetrahydrocarbazole_derivative_1.mol</p>                                                    | <p>NAD_analog_6.mol</p>                                                                         |
| <p>7</p>   | <p>8</p>   | <p>9</p>   |
| <p>NAD_analog_5.mol</p>                                                                      | <p>NAD_analog_4.mol</p>                                                                        | <p>NAD_analog_3.mol</p>                                                                         |
| <p>10</p>  | <p>11</p>  | <p>12</p>  |
| <p>NAD_analog_2.mol</p>                                                                      | <p>NAD_analog_1.mol</p>                                                                        | <p>5113032_EX527.mol</p>                                                                        |

13

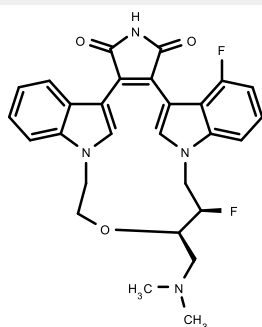Adenosine\_mimetics\_13c.mo  
1

14

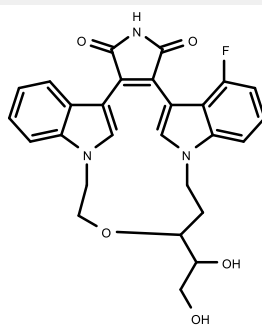Adenosine\_mimetics\_13b.mo  
1

15

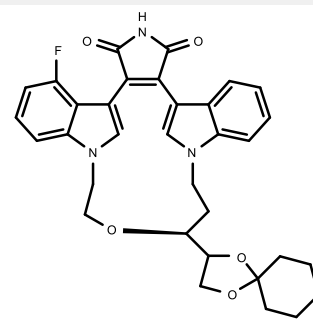Adenosine\_mimetics\_13a.mo  
1

16

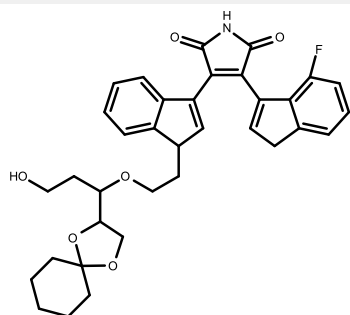Adenosine\_mimetics\_12g.mo  
1

17

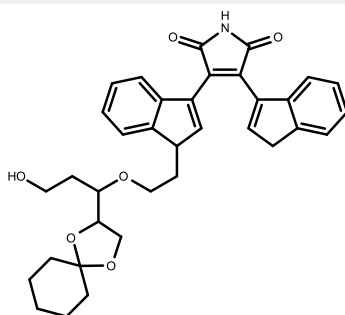Adenosine\_mimetics\_12f.mo  
1

18

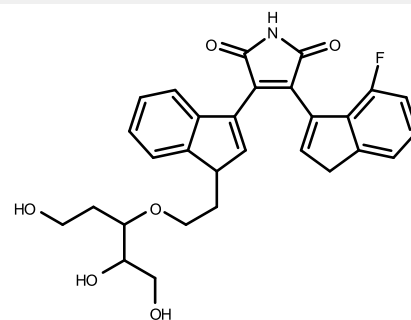Adenosine\_mimetics\_12e.mo  
1



| 1                                                                                  | 2                                                                                   | 3                                                                                    | 4                                                                                     |
|------------------------------------------------------------------------------------|-------------------------------------------------------------------------------------|--------------------------------------------------------------------------------------|---------------------------------------------------------------------------------------|
| 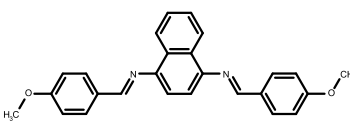   |    |    |    |
| benzene_1_4_diamine_deriv_19.mol                                                   | benzene_1_4_diamine_deriv_18.mol                                                    | benzene_1_4_diamine_deriv_17.mol                                                     | benzene_1_4_diamine_deriv_16.mol                                                      |
| 5                                                                                  | 6                                                                                   | 7                                                                                    | 8                                                                                     |
|  |  |  |  |
| benzene_1_4_diamine_deriv_15.mol                                                   | benzene_1_4_diamine_deriv_14.mol                                                    | benzene_1_4_diamine_deriv_13.mol                                                     | 4-methoxy_nitroaniline.mol benzene_1_4_diamine_deriv_1.mol                            |

| 1                                                                                  | 2                                                                                   | 3                                                                                    | 4                                                                                     |
|------------------------------------------------------------------------------------|-------------------------------------------------------------------------------------|--------------------------------------------------------------------------------------|---------------------------------------------------------------------------------------|
| 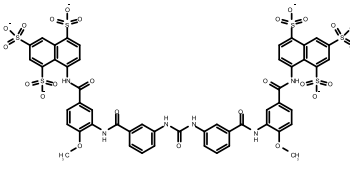   |    |    |    |
| Suramin_analogue_N<br>F260.mol                                                     | Suramin_analogue_N<br>F258.mol                                                      | Suramin_analogue_N<br>F222.mol                                                       | Suramin_analogue_N<br>F198.mol                                                        |
| 5                                                                                  | 6                                                                                   | 7                                                                                    | 8                                                                                     |
|    |    |    |    |
| Suramin_analogue_N<br>F157.mol                                                     | Suramin_analogue_N<br>F151.mol                                                      | Suramin_analogue_N<br>F127.mol                                                       | Suramin_analogue_N<br>F037.mol                                                        |
| 9                                                                                  | 10                                                                                  | 11                                                                                   | 12                                                                                    |
|  |  |  |  |
| Suramin.mol                                                                        | splitomicin_derv_5<br>1.mol                                                         | splitomicin_derv_4<br>3.mol                                                          | splitomicin_derv_4<br>2.mol                                                           |
| 13                                                                                 | 14                                                                                  | 15                                                                                   | 16                                                                                    |
|  |  |  |  |
| splitomicin_derv_4<br>1.mol                                                        | splitomicin_derv_4<br>0.mol                                                         | splitomicin_derv_3<br>9.mol                                                          | splitomicin_derv_3<br>7.mol                                                           |

17

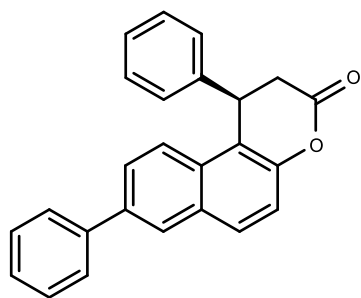

splitomicin\_derv\_3  
6.mol

18

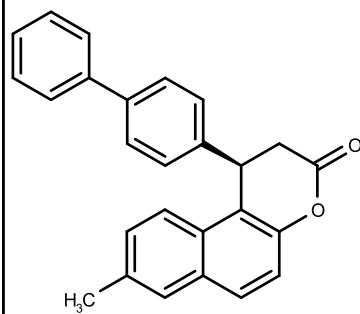

splitomicin\_derv\_3  
0.mol

| 1                                                                                  | 2                                                                                   | 3                                                                                    | 4                                                                                     |
|------------------------------------------------------------------------------------|-------------------------------------------------------------------------------------|--------------------------------------------------------------------------------------|---------------------------------------------------------------------------------------|
| 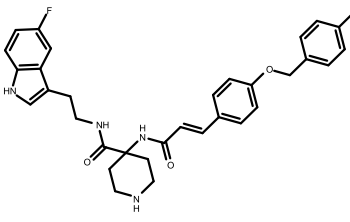   |    |    |    |
| etrahydronaphthalene_derv.mol piperidine_carboxamide.mol                           | Evodiamine_derivative_5.mol                                                         | Evodiamine_derivative_12.mol                                                         | Evodiamine_derivative_11.mol                                                          |
| 5                                                                                  | 6                                                                                   | 7                                                                                    | 8                                                                                     |
|    |    |    |    |
| Evodiamine_derivative_10.mol                                                       | Evodiamine_derivative_9.mol                                                         | Evodiamine_derivative_8.mol                                                          | Evodiamine_derivative_7.mol                                                           |
| 9                                                                                  | 10                                                                                  | 11                                                                                   | 12                                                                                    |
|  |  |  |  |
| Evodiamine_derivative_5.mol                                                        | Evodiamine_derivative_1a.mol                                                        | Evodiamine.mol                                                                       | Amino_acid_tryptamide_derivative_7g.mol                                               |
| 13                                                                                 | 14                                                                                  | 15                                                                                   | 16                                                                                    |
|  |  |  |  |
| Amino_acid_tryptamide_derivative_7f.mol                                            | Amino_acid_tryptamide_derivative_7e_S.mol                                           | Amino_acid_tryptamide_derivative_7e_R.mol                                            | Amino_acid_tryptamide_derivative_7d.mol                                               |

17

18

19

20

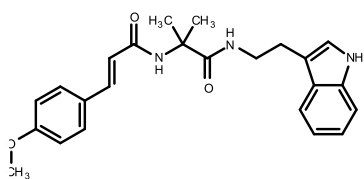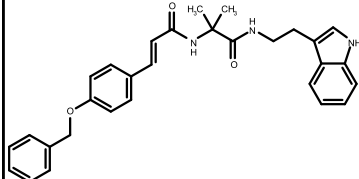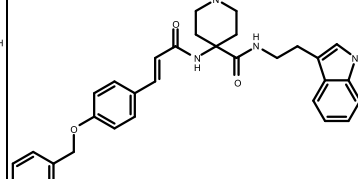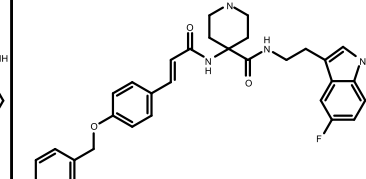

Amino\_acid\_tryptam  
ide\_derivative\_7c.  
mol

```
Amino_acid_tryptam
ide_derivative_7b.
mol
```

```
Amino_acid_tryptam
ide_derivative_7a.
mol
```

```
Amino_acid_tryptam
ide_derivative_1.m
ol
```

| 1                                                                                  | 2                                                                                   | 3                                                                                    | 4                                                                                     |
|------------------------------------------------------------------------------------|-------------------------------------------------------------------------------------|--------------------------------------------------------------------------------------|---------------------------------------------------------------------------------------|
| 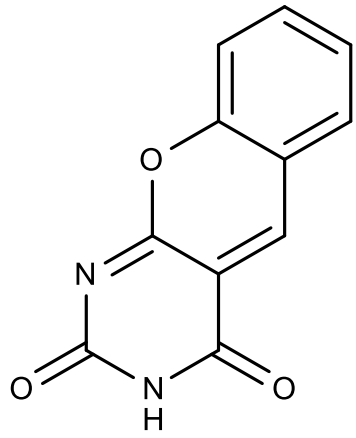   |    |    |    |
| Pyrimidinediones_d<br>erivative1_9.mol                                             | Pyrimidinediones_d<br>erivative1_7.mol                                              | Benzodeazaflavi<br>ns_derivative1_3d.<br>mol                                         | Benzodeazaflavi<br>ns_derivative1_3c.<br>mol                                          |
| 5                                                                                  | 6                                                                                   | 7                                                                                    | 8                                                                                     |
|   |   |   |   |
| Benzodeazaflavi<br>ns_derivative1_3b.<br>mol                                       | Benzodeazaflavi<br>ns_derivative1_3a.<br>mol                                        | Benzodeazaflavi<br>ns_derivative1_2f.<br>mol                                         | Benzodeazaflavi<br>ns_derivative1_2e.<br>mol                                          |
| 9                                                                                  | 10                                                                                  | 11                                                                                   | 12                                                                                    |
|  |  |  |  |
| Benzodeazaflavi<br>ns_derivative1_2d.<br>mol                                       | Benzodeazaflavi<br>ns_derivative1_2c.<br>mol                                        | Benzodeazaflavi<br>ns_derivative1_2b.<br>mol                                         | Benzodeazaflavi<br>ns_derivative1_2a.<br>mol                                          |

| 1                                                                                  | 2                                                                                   | 3                                                                                    | 4                                                                                     |
|------------------------------------------------------------------------------------|-------------------------------------------------------------------------------------|--------------------------------------------------------------------------------------|---------------------------------------------------------------------------------------|
| 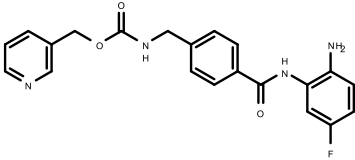   |    |    |    |
| Benzamide_derivati<br>ve1 6h.mol                                                   | Benzamide_derivati<br>ve1 6g.mol                                                    | Benzamide_derivati<br>ve1 6f.mol                                                     | Benzamide_derivati<br>ve1 6e.mol                                                      |
| 5                                                                                  | 6                                                                                   | 7                                                                                    | 8                                                                                     |
|    |    |    |    |
| Benzamide_derivati<br>ve1 6d.mol                                                   | Benzamide_derivati<br>ve1 6c.mol                                                    | Benzamide_derivati<br>ve1 6b.mol                                                     | Benzamide_derivati<br>ve1 6a.mol                                                      |
| 9                                                                                  | 10                                                                                  | 11                                                                                   | 12                                                                                    |
|  |  |  |  |
| Benzamide_derivati<br>ve1 4e.mol                                                   | Benzamide_derivati<br>ve1 4d.mol                                                    | Benzamide_derivati<br>ve1 4c.mol                                                     | Benzamide_derivati<br>ve1 4b.mol                                                      |
| 13                                                                                 |                                                                                     |                                                                                      |                                                                                       |
|  |                                                                                     |                                                                                      |                                                                                       |
| Benzamide_derivati<br>ve1 4a.mol                                                   |                                                                                     |                                                                                      |                                                                                       |

| 1                                                                                  | 2                                                                                   | 3                                                                                    | 4                                                                                     |
|------------------------------------------------------------------------------------|-------------------------------------------------------------------------------------|--------------------------------------------------------------------------------------|---------------------------------------------------------------------------------------|
| 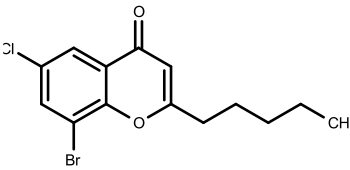   |    |    |    |
| Chroman_4_one_derivative_1n.mol Chromone_derivative_3a.mol                         | Untitled Document-1 Chroman_4_one_derivative_stereoS_1a.mol                         | Chroman_4_one_derivative_stereo+1a.mol Chroman_4_one_derivative_stereoR_1a.mol       | Chroman_4_one_derivative_1k.mol Chroman_4_one_derivative_1l.mol                       |
| 5                                                                                  | 6                                                                                   | 7                                                                                    | 8                                                                                     |
|    |    |    |    |
| Chroman_4_one_derivative_1j.mol Chroman_4_one_derivative_1k.mol                    | Chroman_4_one_derivative_1i.mol Chroman_4_one_derivative_1j.mol                     | Chroman_4_one_derivative_1h.mol Chroman_4_one_derivative_1i.mol                      | Chroman_4_one_derivative_1g.mol Chroman_4_one_derivative_1h.mol                       |
| 9                                                                                  | 10                                                                                  | 11                                                                                   | 12                                                                                    |
|  |  |  |  |
| Chroman_4_one_derivative_1f.mol Chroman_4_one_derivative_1g.mol                    | Chroman_4_one_derivative_1f.mol Chroman_4_one_derivative_1f.mol                     | Chroman_4_one_derivative_1d.mol Chroman_4_one_derivative_1e.mol                      | Chroman_4_one_derivative_1c.mol Chroman_4_one_derivative_1d.mol                       |
| 13                                                                                 | 14                                                                                  | 15                                                                                   |                                                                                       |
|  |  |  |                                                                                       |
| Chroman_4_one_derivative_1b.mol Chroman_4_one_derivative_1c.mol                    | Chroman_4_one_derivative_1a.mol Chroman_4_one_derivative_1b.mol                     | Chroman_4_one_derivative_stereo-1a.mol Chroman_4_one_derivative_1a.mol               |                                                                                       |



| 1                                                                                  | 2                                                                                   | 3                                                                                    | 4                                                                                     |
|------------------------------------------------------------------------------------|-------------------------------------------------------------------------------------|--------------------------------------------------------------------------------------|---------------------------------------------------------------------------------------|
| 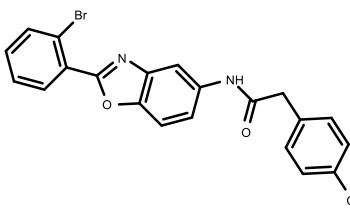   |    |    |    |
| Phenyl_benzoxazole_derivative_16.mol<br>Phenyl_benzoxazole_derivative_17.mol       | Phenyl_benzoxazole_derivative_15.mol<br>Phenyl_benzoxazole_derivative_16.mol        | Phenyl_benzoxazole_derivative_14.mol<br>Phenyl_benzoxazole_derivative_15.mol         | Phenyl_benzoxazole_derivative_13.mol<br>Phenyl_benzoxazole_derivative_14.mol          |
| 5                                                                                  | 6                                                                                   | 7                                                                                    | 8                                                                                     |
|    |    |    |    |
| Phenyl_benzoxazole_derivative_12.mol<br>Phenyl_benzoxazole_derivative_13.mol       | Phenyl_benzoxazole_derivative_11.mol<br>Phenyl_benzoxazole_derivative_12.mol        | Phenyl_benzoxazole_derivative_10.mol<br>Phenyl_benzoxazole_derivative_11.mol         | Phenyl_benzoxazole_derivative_9.mol<br>Phenyl_benzoxazole_derivative_10.mol           |
| 9                                                                                  | 10                                                                                  | 11                                                                                   | 12                                                                                    |
|  |  |  |  |
| Phenyl_benzoxazole_derivative_8.mol<br>Phenyl_benzoxazole_derivative_9.mol         | Phenyl_benzoxazole_derivative_7.mol<br>Phenyl_benzoxazole_derivative_8.mol          | Phenyl_benzoxazole_derivative_6.mol<br>Phenyl_benzoxazole_derivative_7.mol           | Phenyl_benzoxazole_derivative_5.mol<br>Phenyl_benzoxazole_derivative_6.mol            |
| 13                                                                                 | 14                                                                                  | 15                                                                                   | 16                                                                                    |
|  |  |  |  |
| Phenyl_benzoxazole_derivative_4.mol<br>Phenyl_benzoxazole_derivative_5.mol         | Phenyl_benzoxazole_derivative_3.mol<br>Phenyl_benzoxazole_derivative_4.mol          | Phenyl_benzoxazole_derivative_2.mol<br>Phenyl_benzoxazole_derivative_3.mol           | Phenyl_benzoxazole_derivative_1.mol<br>Phenyl_benzoxazole_derivative_2.mol            |

17

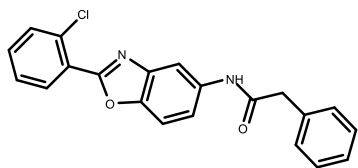

Untitled Document-  
1 Phenyl\_benzoxazo  
le\_derivative\_1.mo  
l

| 1                                                       | 2                                                       | 3                                                       | 4                                                       |
|---------------------------------------------------------|---------------------------------------------------------|---------------------------------------------------------|---------------------------------------------------------|
|                                                         |                                                         |                                                         |                                                         |
| Thiobarbiturates_d<br>erivative1_1.mol                  | Sirtinol.mol                                            | Salermide.mol                                           | Pyrimidinediones_d<br>erivative1_salermi<br>de.mol      |
| 5                                                       | 6                                                       | 7                                                       | 8                                                       |
|                                                         |                                                         |                                                         |                                                         |
| hydroxy_napthylmet<br>hylene_aminophenyl<br>derv 15.mol | hydroxy_napthylmet<br>hylene_aminophenyl<br>derv 14.mol | hydroxy_napthylmet<br>hylene_aminophenyl<br>derv 13.mol | hydroxy_napthylmet<br>hylene_aminophenyl<br>derv 12.mol |
| 9                                                       | 10                                                      | 11                                                      | 12                                                      |
|                                                         |                                                         |                                                         |                                                         |
| hydroxy_napthylmet<br>hylene_aminophenyl<br>derv 11.mol | hydroxy_napthylmet<br>hylene_aminophenyl<br>derv 10.mol | hydroxy_napthylmet<br>hylene_aminophenyl<br>derv 9.mol  | hydroxy_napthylmet<br>hylene_aminophenyl<br>derv 8.mol  |
| 13                                                      | 14                                                      | 15                                                      | 16                                                      |
|                                                         |                                                         |                                                         |                                                         |
| hydroxy_napthylmet<br>hylene_aminophenyl<br>derv 7.mol  | hydroxy_napthylmet<br>hylene_aminophenyl<br>derv 6.mol  | hydroxy_napthylmet<br>hylene_aminophenyl<br>derv 5.mol  | hydroxy_napthylmet<br>hylene_aminophenyl<br>derv 4.mol  |



| 1                                                                                  | 2                                                                                   | 3                                                                                    | 4                                                                                     |
|------------------------------------------------------------------------------------|-------------------------------------------------------------------------------------|--------------------------------------------------------------------------------------|---------------------------------------------------------------------------------------|
| 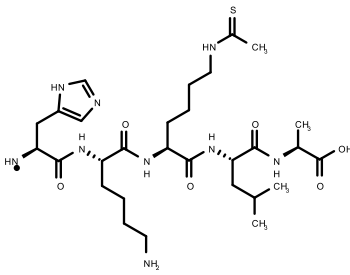   |    |    |    |
| Thioacetyl_containig peptide 23.mol                                                | Thioacetyl_containig peptide 22.mol                                                 | Thioacetyl_containig peptide 21.mol                                                  | Thioacetyl_containig peptide 20.mol                                                   |
| 5                                                                                  | 6                                                                                   | 7                                                                                    | 8                                                                                     |
|    |    |    |    |
| Thioacetyl_containig peptide 19.mol                                                | Thioacetyl_containig peptide 18.mol                                                 | Thioacetyl_containig peptide 17.mol                                                  | Thioacetyl_containig peptide 16.mol                                                   |
| 9                                                                                  | 10                                                                                  | 11                                                                                   | 12                                                                                    |
|  |  |  |  |
| Thioacetyl_containig peptide 15.mol                                                | Thioacetyl_containig peptide 14.mol                                                 | Thioacetyl_containig peptide 13.mol                                                  | Thioacetyl_containig peptide 12.mol                                                   |
| 13                                                                                 | 14                                                                                  | 15                                                                                   | 16                                                                                    |
|  |  |  |  |
| Thioacetyl_containig peptide 11.mol                                                | Thioacetyl_containig peptide 10.mol                                                 | Thioacetyl_containig peptide 8.mol                                                   | Thioacetyl_containig peptide 7.mol                                                    |

| 17                                                                               | 18                                                                                | 19                                                                                 | 20                                                                                 |
|----------------------------------------------------------------------------------|-----------------------------------------------------------------------------------|------------------------------------------------------------------------------------|------------------------------------------------------------------------------------|
| 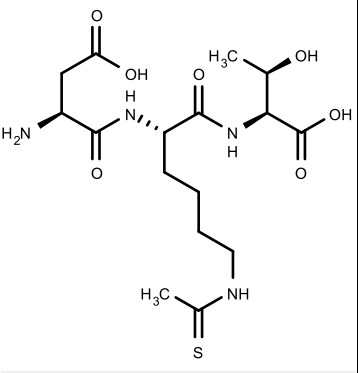  |   |   |  |
| Thioacetyl_contain<br>ig peptide 4.mol                                           | Thioacetyl_contain<br>ig peptide 3.mol                                            | Thioacetyl_contain<br>ig peptide 2.mol                                             | Thioacetyl_contain<br>ig peptide 1.mol                                             |
| 21                                                                               | 22                                                                                | 23                                                                                 |                                                                                    |
|  |  |  |                                                                                    |
| N_epsilon_Modified<br>lysine derivative                                          | N_epsilon_Modified<br>lysine derivative                                           | Untitled Document-<br>1 HKK thioaceyl LM                                           |                                                                                    |
|                                                                                  |                                                                                   |                                                                                    |                                                                                    |
|                                                                                  |                                                                                   |                                                                                    |                                                                                    |

| 1                                                                                   | 2                                                                                   | 3                                                                                    | 4                                                                                     |
|-------------------------------------------------------------------------------------|-------------------------------------------------------------------------------------|--------------------------------------------------------------------------------------|---------------------------------------------------------------------------------------|
| 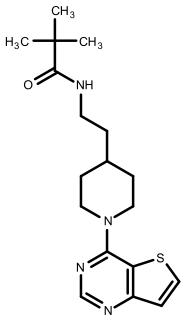    |     |    |     |
| 71654993 Thieno_pyrimidine_carboxamide analog 42.mol                                | 71654992 Thieno_pyrimidine_carboxamide analog 41.mol                                | Thieno_pyrimidine_carboxamide analog 40.mol                                          | 71654990 Thieno_pyrimidine_carboxamide analog 39.mol                                  |
| 5                                                                                   | 6                                                                                   | 7                                                                                    | 8                                                                                     |
|    |    |    |    |
| 71654989 Thieno_pyrimidine_carboxamide analog 38.mol                                | 71654988 Thieno_pyrimidine_carboxamide analog 37.mol                                | 71654987 Thieno_pyrimidine_carboxamide analog 36.mol                                 | 71654911 Thieno_pyrimidine_carboxamide analog 32.mol                                  |
| 9                                                                                   | 10                                                                                  | 11                                                                                   | 12                                                                                    |
|  |  |  |  |
| 71304815 Thieno_pyrimidine_carboxamide analog 31.mol                                | 71654910 Thieno_pyrimidine_carboxamide analog 30.mol                                | 71654909 Thieno_pyrimidine_carboxamide analog 29.mol                                 | 71304814 Thieno_pyrimidine_carboxamide analog 28.mol                                  |
| 13                                                                                  | 14                                                                                  | 15                                                                                   | 16                                                                                    |
|  |  |  |  |
| 71654843 Thieno_pyrimidine_carboxamide analog 27.mol                                | 71654842 Thieno_pyrimidine_carboxamide analog 26.mol                                | 71654841 Thieno_pyrimidine_carboxamide analog 25.mol                                 | 71654840 Thieno_pyrimidine_carboxamide analog 24.mol                                  |

| 17                                                                                  | 18                                                                                  | 19                                                                                   | 20                                                                                    |
|-------------------------------------------------------------------------------------|-------------------------------------------------------------------------------------|--------------------------------------------------------------------------------------|---------------------------------------------------------------------------------------|
| 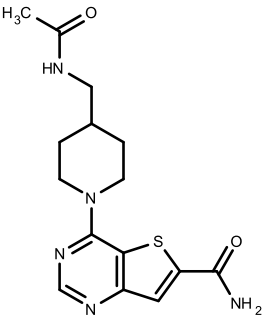    |    |     |     |
| 71654839 Thieno_pyrimidine_carboxamide analog 23.mol                                | 71654775 Thieno_pyrimidine_carboxamide analog 21.mol                                | 71654774 Thieno_pyrimidine_carboxamide analog 20.mol                                 | 71654773 Thieno_pyrimidine_carboxamide analog 19.mol                                  |
| 21                                                                                  | 22                                                                                  | 23                                                                                   | 24                                                                                    |
|    |    |    |    |
| 71654772 Thieno_pyrimidine_carboxamide analog 18.mol                                | 71654771 Thieno_pyrimidine_carboxamide analog 17.mol                                | 71655141 Thieno_pyrimidine_carboxamide analog 16a.mol                                | 71655063 Thieno_pyrimidine_carboxamide analog 15a.mol                                 |
| 25                                                                                  | 26                                                                                  | 27                                                                                   | 28                                                                                    |
|  |  |  |  |
| 71655062 Thieno_pyrimidine_carboxamide analog 11d.mol                               | 71304813 Thieno_pyrimidine_carboxamide analog 11c.mol                               | 71655061 Thieno_pyrimidine_carboxamide analog 11b.mol                                | 71655060 Thieno_pyrimidine_carboxamide analog 11a.mol                                 |
|                                                                                     |                                                                                     |                                                                                      |                                                                                       |



| 1                                                                                  | 2                                                                                   | 3                                                                                    | 4                                                                                     |
|------------------------------------------------------------------------------------|-------------------------------------------------------------------------------------|--------------------------------------------------------------------------------------|---------------------------------------------------------------------------------------|
| 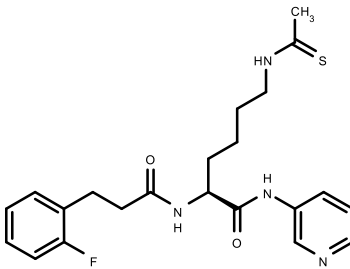   |    |    |    |
| Thioacetylated_peptide_derivative_39.mol                                           | Thioacetylated_peptide_derivative_38.mol                                            | Thioacetylated_peptide_derivative_37.mol                                             | Thioacetylated_peptide_derivative_36.mol                                              |
| 5                                                                                  | 6                                                                                   | 7                                                                                    | 8                                                                                     |
|    |    |    |    |
| Thioacetylated_peptide_derivative_35.mol                                           | Thioacetylated_peptide_derivative_34.mol                                            | Thioacetylated_peptide_derivative_33.mol                                             | Thioacetylated_peptide_derivative_32.mol                                              |
| 9                                                                                  | 10                                                                                  | 11                                                                                   | 12                                                                                    |
|  |  |  |  |
| Thioacetylated_peptide_derivative_31.mol                                           | Thioacetylated_peptide_derivative_30.mol                                            | Thioacetylated_peptide_derivative_29.mol                                             | Thioacetylated_peptide_derivative_28.mol                                              |
| 13                                                                                 | 14                                                                                  | 15                                                                                   | 16                                                                                    |
|  |  |  |  |
| Thioacetylated_peptide_derivative_27.mol                                           | Thioacetylated_peptide_derivative_26.mol                                            | Thioacetylated_peptide_derivative_25.mol                                             | Thioacetylated_peptide_derivative_23.mol                                              |

| 17                                                                                 | 18                                                                                  | 19                                                                                   | 20                                                                                    |
|------------------------------------------------------------------------------------|-------------------------------------------------------------------------------------|--------------------------------------------------------------------------------------|---------------------------------------------------------------------------------------|
| 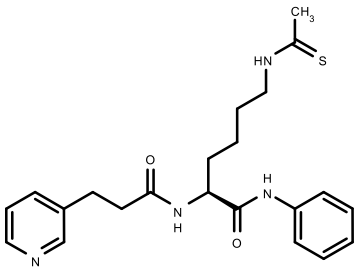   |     |    |    |
| Thioacetylated_peptide_derivative_19.mol                                           | Thioacetylated_peptide_derivative_16.mol                                            | Thioacetylated_peptide_derivative_15.mol                                             | Thioacetylated_peptide_derivative_14.mol                                              |
| 21                                                                                 | 22                                                                                  | 23                                                                                   | 24                                                                                    |
|    |    |    |    |
| Thioacetylated_peptide_derivative_13.mol                                           | Thioacetylated_peptide_derivative_12.mol                                            | N_epsilon_Modified_lysine_derivative_89.mol                                          | N_epsilon_Modified_lysine_derivative_86.mol                                           |
| 25                                                                                 | 26                                                                                  | 27                                                                                   | 28                                                                                    |
|  |  |  |  |
| N_epsilon_Modified_lysine_derivative_84.mol                                        | N_epsilon_Modified_lysine_derivative_83.mol                                         | K_thioaceyl_A_derv_5.mol K_thioaceyl_A_derv_6.mol                                    | K_thioaceyl_A_derv_4.mol K_thioaceyl_A_derv_5.mol                                     |
| 29                                                                                 | 30                                                                                  | 31                                                                                   | 32                                                                                    |
|  |  |  |  |
| K_thioaceyl_A_derv_3.mol K_thioaceyl_A_derv_4.mol                                  | K_thioaceyl_A_derv_2.mol K_thioaceyl_A_derv_3.mol                                   | K_thioaceyl_A_derv_1.mol K_thioaceyl_A_derv_2.mol                                    | Cbz_K_thioaceyl_derv_4.mol Cbz_K_thioaceyl_derv_5.mol                                 |

33

34

35

36

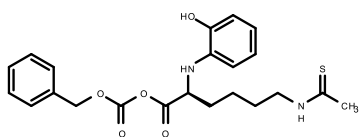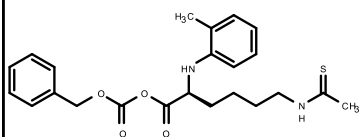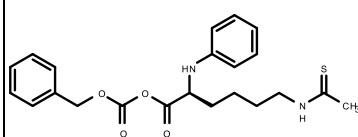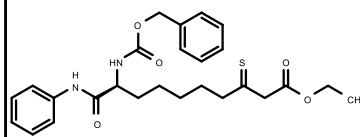

Cbz\_K\_thioacyl\_de  
rv\_3.mol Cbz\_K\_thi  
oacyl\_derv\_4.mol

```
Cbz_K_thioacyl_de
rv_2.mol Cbz_K_thi
oacyl deriv 3.mol
```

```
K_thioacyl_A_derv
_7.mol Cbz_K_thioa
ceyl derv 1.mol
```

```
Acetyl_lysine_mimi
cs1 5.mol
```

37

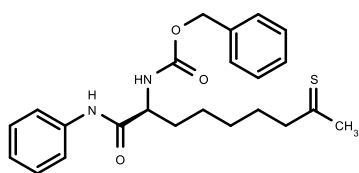Acetyl\_lysine\_mimic  
cs1\_4.mol

|                                                                                                                                               |                                                                                                                                                |                                                                                                                                                 |                                                                                                                                                  |
|-----------------------------------------------------------------------------------------------------------------------------------------------|------------------------------------------------------------------------------------------------------------------------------------------------|-------------------------------------------------------------------------------------------------------------------------------------------------|--------------------------------------------------------------------------------------------------------------------------------------------------|
| 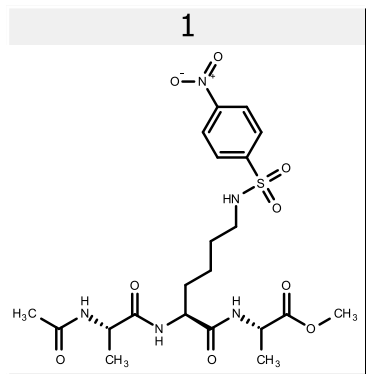 <p>N_epsilon_Modified<br/>lysine_derivative<br/>82.mol</p>    |  <p>N_epsilon_Modified<br/>lysine_derivative<br/>81.mol</p>    |  <p>N_epsilon_Modified<br/>lysine_derivative<br/>80.mol</p>    |  <p>N_epsilon_Modified<br/>lysine_derivative<br/>79.mol</p>    |
|  <p>N_epsilon_Modified<br/>lysine_derivative<br/>78.mol</p>   |  <p>N_epsilon_Modified<br/>lysine_derivative<br/>76.mol</p>   |  <p>N_epsilon_Modified<br/>lysine_derivative<br/>75.mol</p>   |  <p>N_epsilon_Modified<br/>lysine_derivative<br/>74.mol</p>   |
|  <p>N_epsilon_Modified<br/>lysine_derivative<br/>73.mol</p> |  <p>N_epsilon_Modified<br/>lysine_derivative<br/>72.mol</p> |  <p>N_epsilon_Modified<br/>lysine_derivative<br/>71.mol</p> |  <p>N_epsilon_Modified<br/>lysine_derivative<br/>70.mol</p> |
|  <p>N_epsilon_Modified<br/>lysine_derivative<br/>69.mol</p> |  <p>N_epsilon_Modified<br/>lysine_derivative<br/>68.mol</p> |  <p>N_epsilon_Modified<br/>lysine_derivative<br/>67.mol</p> |  <p>N_epsilon_Modified<br/>lysine_derivative<br/>66.mol</p> |

|                                                                                                                                                         |                                                                                                                                                          |                                                                                                                                                           |                                                                                                                                                            |
|---------------------------------------------------------------------------------------------------------------------------------------------------------|----------------------------------------------------------------------------------------------------------------------------------------------------------|-----------------------------------------------------------------------------------------------------------------------------------------------------------|------------------------------------------------------------------------------------------------------------------------------------------------------------|
| <p>17</p> 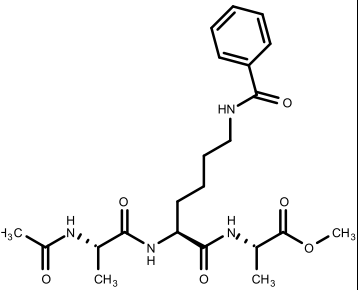 <p>N_epsilon_Modified<br/>lysine_derivative<br/>65.mol</p>   | <p>18</p>  <p>N_epsilon_Modified<br/>lysine_derivative<br/>64.mol</p>   | <p>19</p>  <p>N_epsilon_Modified<br/>lysine_derivative<br/>62.mol</p>   | <p>20</p>  <p>N_epsilon_Modified<br/>lysine_derivative<br/>61.mol</p>   |
| <p>21</p>  <p>N_epsilon_Modified<br/>lysine_derivative<br/>60.mol</p>   | <p>22</p>  <p>N_epsilon_Modified<br/>lysine_derivative<br/>59.mol</p>   | <p>23</p>  <p>N_epsilon_Modified<br/>lysine_derivative<br/>58.mol</p>   | <p>24</p>  <p>N_epsilon_Modified<br/>lysine_derivative<br/>57.mol</p>   |
| <p>25</p>  <p>N_epsilon_Modified<br/>lysine_derivative<br/>56.mol</p> | <p>26</p>  <p>N_epsilon_Modified<br/>lysine_derivative<br/>55.mol</p> | <p>27</p>  <p>N_epsilon_Modified<br/>lysine_derivative<br/>54.mol</p> | <p>28</p>  <p>N_epsilon_Modified<br/>lysine_derivative<br/>53.mol</p> |
| <p>29</p>  <p>N_epsilon_Modified<br/>lysine_derivative<br/>52.mol</p> | <p>30</p>  <p>N_epsilon_Modified<br/>lysine_derivative<br/>51.mol</p> | <p>31</p>  <p>N_epsilon_Modified<br/>lysine_derivative<br/>50.mol</p> | <p>32</p>  <p>N_epsilon_Modified<br/>lysine_derivative<br/>49.mol</p> |

| 33                                                                               | 34                                                                                | 35                                                                                 | 36                                                                                 |
|----------------------------------------------------------------------------------|-----------------------------------------------------------------------------------|------------------------------------------------------------------------------------|------------------------------------------------------------------------------------|
| 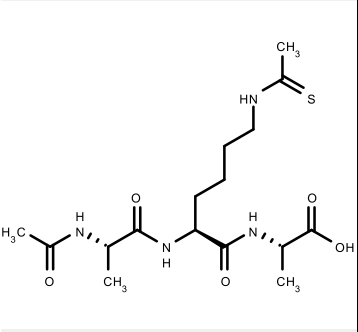  |   |   |  |
| N_epsilon_Modified lysine_derivative 48.mol                                      | AK_thioaceyl_A.mol                                                                | Ac_K(thioaceyl)A_O Me.mol Ac_PK_thioaceyl A.mol                                    | K(thioaceyl)A.mol Ac_K_thioaceyl_A_O Me.mol                                        |
| 37                                                                               | 38                                                                                | 39                                                                                 |                                                                                    |
|  |  |  |                                                                                    |
| Ac-AK(thioaceyl)A.mol Ac_AK_thioaceyl l A OMe.mol                                | Ac-AK(thioaceyl)A.mol Ac_AK_thioaceyl l A NHMe.mol                                | KK(thioaceyl)L.mol Ac_AK_thioaceyl_A .mol                                          |                                                                                    |
|                                                                                  |                                                                                   |                                                                                    |                                                                                    |
|                                                                                  |                                                                                   |                                                                                    |                                                                                    |

| 1                                                                                  | 2                                                                                   | 3                                                                                    | 4                                                                                     |
|------------------------------------------------------------------------------------|-------------------------------------------------------------------------------------|--------------------------------------------------------------------------------------|---------------------------------------------------------------------------------------|
| 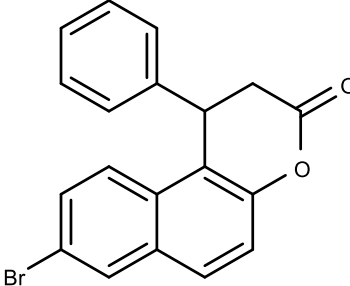   |    |    |    |
| Thiobarbiturates_d<br>erivative1 24.mol                                            | Thiobarbiturates_d<br>erivative1 23.mol                                             | Thiobarbiturates_d<br>erivative1 22.mol                                              | Thiobarbiturates_d<br>erivative1 21.mol                                               |
| 5                                                                                  | 6                                                                                   | 7                                                                                    | 8                                                                                     |
|    |    |    |    |
| Thiobarbiturates_d<br>erivative1 20.mol                                            | Thiobarbiturates_d<br>erivative1 19.mol                                             | Thiobarbiturates_d<br>erivative1 18.mol                                              | Thiobarbiturates_d<br>erivative1 17.mol                                               |
| 9                                                                                  | 10                                                                                  | 11                                                                                   | 12                                                                                    |
|  |  |  |  |
| Thiobarbiturates_d<br>erivative1 16.mol                                            | Thiobarbiturates_d<br>erivative1 15.mol                                             | Thiobarbiturates_d<br>erivative1 14.mol                                              | Thiobarbiturates_d<br>erivative1 13.mol                                               |
| 13                                                                                 | 14                                                                                  | 15                                                                                   | 16                                                                                    |
|  |  |  |  |
| Thiobarbiturates_d<br>erivative1 12.mol                                            | Thiobarbiturates_d<br>erivative1 6.mol                                              | Thiobarbiturates_d<br>erivative1 2.mol                                               | splitomicin_derv_5<br>2.mol                                                           |

|                                                                                    |                                                                                     |                                                                                      |                                                                                       |
|------------------------------------------------------------------------------------|-------------------------------------------------------------------------------------|--------------------------------------------------------------------------------------|---------------------------------------------------------------------------------------|
| 17                                                                                 | 18                                                                                  | 19                                                                                   | 20                                                                                    |
| 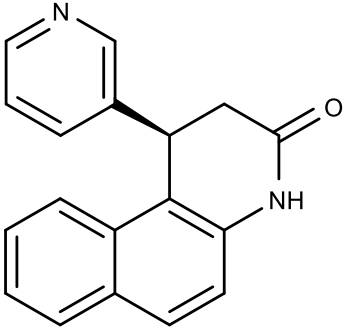   |    |    |    |
| splitomicin_derv_5<br>0.mol                                                        | splitomicin_derv_4<br>9.mol                                                         | splitomicin_derv_4<br>8.mol                                                          | splitomicin_derv_4<br>7.mol                                                           |
| 21                                                                                 | 22                                                                                  | 23                                                                                   | 24                                                                                    |
|    |    |    |    |
| splitomicin_derv_4<br>6.mol                                                        | splitomicin_derv_4<br>5.mol                                                         | splitomicin_derv_4<br>4.mol                                                          | splitomicin_derv_3<br>8.mol                                                           |
| 25                                                                                 | 26                                                                                  | 27                                                                                   | 28                                                                                    |
|  |  |  |  |
| splitomicin_derv_3<br>5.mol                                                        | splitomicin_derv_3<br>4.mol                                                         | splitomicin_derv_3<br>3.mol                                                          | splitomicin_derv_3<br>2.mol                                                           |
| 29                                                                                 | 30                                                                                  | 31                                                                                   | 32                                                                                    |
|  |  |  |  |
| splitomicin_derv_3<br>1.mol                                                        | splitomicin_derv_2<br>9.mol                                                         | splitomicin_derv_2<br>8.mol                                                          | splitomicin_derv_2<br>7.mol                                                           |



|                                                                                                                                           |                                                                                                                                   |                                                                                                                                    |                                                                                                                                            |
|-------------------------------------------------------------------------------------------------------------------------------------------|-----------------------------------------------------------------------------------------------------------------------------------|------------------------------------------------------------------------------------------------------------------------------------|--------------------------------------------------------------------------------------------------------------------------------------------|
| <p>33</p> 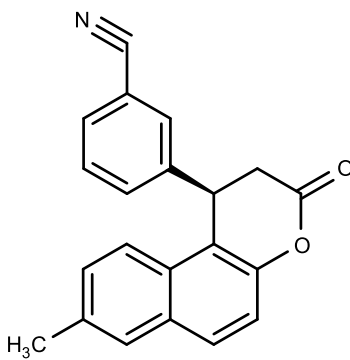 <p>splitomicin_derv_2<br/>6.mol</p>             | <p>34</p>  <p>splitomicin_derv_2<br/>5.mol</p>    | <p>35</p>  <p>splitomicin_derv_2<br/>4.mol</p>    | <p>36</p>  <p>splitomicin_derv_2<br/>3 S isomer.mol</p>  |
| <p>37</p>  <p>splitomicin_derv_2<br/>3 R isomer.mol</p>   | <p>38</p>  <p>splitomicin_derv_2<br/>2.mol</p>   | <p>39</p>  <p>splitomicin_derv_2<br/>1.mol</p>   | <p>40</p>  <p>splitomicin_derv_2<br/>0 S isomer.mol</p> |
| <p>41</p>  <p>splitomicin_derv_2<br/>0 R isomer.mol</p> | <p>42</p>  <p>splitomicin_derv_1<br/>9.mol</p> | <p>43</p>  <p>splitomicin_derv_1<br/>8.mol</p> | <p>44</p>  <p>splitomicin_derv_1<br/>7.mol</p>        |
| <p>45</p>  <p>splitomicin_derv_1<br/>5.mol</p>          | <p>46</p>  <p>splitomicin_derv_1<br/>4.mol</p> | <p>47</p>  <p>splitomicin_derv_1<br/>3.mol</p> | <p>48</p>  <p>splitomicin_derv_1<br/>2.mol</p>        |

| 49                                                                                 | 50                                                                                  | 51                                                                                   | 52                                                                                  |
|------------------------------------------------------------------------------------|-------------------------------------------------------------------------------------|--------------------------------------------------------------------------------------|-------------------------------------------------------------------------------------|
| 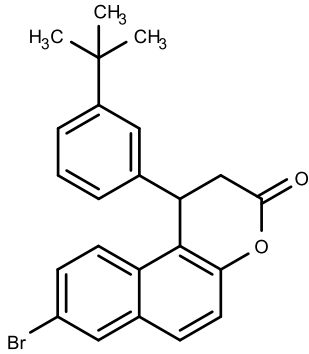   |    |    |  |
| splitomicin_derv_1<br>1.mol                                                        | splitomicin_derv_1<br>0.mol                                                         | splitomicin_derv_8<br>.mol splitomicin d                                             | splitomicin_derv_8<br>.mol                                                          |
| 53                                                                                 | 54                                                                                  | 55                                                                                   | 56                                                                                  |
|    |    |    |  |
| splitomicin_derv_7<br>.mol                                                         | splitomicin_derv_6<br>.mol                                                          | splitomicin_derv_4<br>.mol splitomicin d                                             | splitomicin_derv_3<br>.mol splitomicin d                                            |
| 57                                                                                 | 58                                                                                  | 59                                                                                   |                                                                                     |
|  |  |  |                                                                                     |
| splitomicin_derv_2<br>.mol splitomicin d                                           | splitomicin_derv_1<br>.mol splitomicin d                                            | Untitled Document-<br>1 splitomicin derv                                             |                                                                                     |

| 1                                        | 2                                        | 3                                        | 4                                        |
|------------------------------------------|------------------------------------------|------------------------------------------|------------------------------------------|
|                                          |                                          |                                          |                                          |
| Anilinobenzamide_<br>derivative 7a.mol   | Anilinobenzamide_d<br>erivative1 34.mol  | Anilinobenzamide_d<br>erivative1 33p.mol | Anilinobenzamide_d<br>erivative1 33o.mol |
| 5                                        | 6                                        | 7                                        | 8                                        |
|                                          |                                          |                                          |                                          |
| Anilinobenzamide_d<br>erivative1 33n.mol | Anilinobenzamide_d<br>erivative1 33m.mol | Anilinobenzamide_d<br>erivative1 33l.mol | Anilinobenzamide_d<br>erivative1 33k.mol |
| 9                                        | 10                                       | 11                                       | 12                                       |
|                                          |                                          |                                          |                                          |
| Anilinobenzamide_d<br>erivative1 33j.mol | Anilinobenzamide_d<br>erivative1 33i.mol | Anilinobenzamide_d<br>erivative1 33h.mol | Anilinobenzamide_d<br>erivative1 33g.mol |
| 13                                       | 14                                       | 15                                       | 16                                       |
|                                          |                                          |                                          |                                          |
| Anilinobenzamide_d<br>erivative1 33f.mol | Anilinobenzamide_d<br>erivative1 33e.mol | Anilinobenzamide_d<br>erivative1 33d.mol | Anilinobenzamide_d<br>erivative1 33c.mol |

| 17                                                                                  | 18                                                                                  | 19                                                                                   | 20                                                                                    |
|-------------------------------------------------------------------------------------|-------------------------------------------------------------------------------------|--------------------------------------------------------------------------------------|---------------------------------------------------------------------------------------|
| 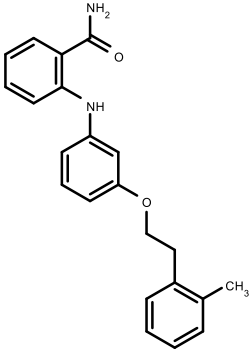   |    |    |    |
| Anilinobenzamide_d<br>erivative1 33b.mol                                            | Anilinobenzamide_d<br>erivative1 33a.mol                                            | Anilinobenzamide_d<br>erivative1 32.mol                                              | Anilinobenzamide_d<br>erivative1 29.mol                                               |
| 21                                                                                  | 22                                                                                  | 23                                                                                   | 24                                                                                    |
|    |    |    |    |
| Anilinobenzamide_d<br>erivative1 28.mol                                             | Anilinobenzamide_d<br>erivative1 27.mol                                             | Anilinobenzamide_d<br>erivative1 26.mol                                              | Anilinobenzamide_d<br>erivative1 25.mol                                               |
| 25                                                                                  | 26                                                                                  | 27                                                                                   | 28                                                                                    |
|  |  |  |  |
| Anilinobenzamide_d<br>erivative1 24.mol                                             | Anilinobenzamide_d<br>erivative1 23.mol                                             | Anilinobenzamide_d<br>erivative1 22.mol                                              | Anilinobenzamide_d<br>erivative1 21.mol                                               |
| 29                                                                                  | 30                                                                                  | 31                                                                                   | 32                                                                                    |
|  |  |  |  |
| Anilinobenzamide_d<br>erivative1 20.mol                                             | Anilinobenzamide_d<br>erivative1 19.mol                                             | Anilinobenzamide_d<br>erivative1 16.mol                                              | Anilinobenzamide_d<br>erivative1 15.mol                                               |

|                                                                                               |                                                                                               |                                                                                                |                                                                                                 |
|-----------------------------------------------------------------------------------------------|-----------------------------------------------------------------------------------------------|------------------------------------------------------------------------------------------------|-------------------------------------------------------------------------------------------------|
| <p>33</p> 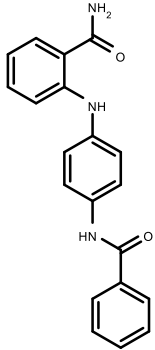   | <p>34</p>    | <p>35</p>    | <p>36</p>    |
| Anilinobenzamide_d<br>erivative1 14.mol                                                       | Anilinobenzamide_d<br>erivative1 13.mol                                                       | Anilinobenzamide_d<br>erivative1 12.mol                                                        | Anilinobenzamide_d<br>erivative1 11.mol                                                         |
| <p>37</p>    | <p>38</p>    | <p>39</p>    | <p>40</p>    |
| Anilinobenzamide_d<br>erivative1 10.mol                                                       | Anilinobenzamide_d<br>erivative1 9.mol                                                        | Anilinobenzamide_d<br>erivative1 8.mol                                                         | Anilinobenzamide_d<br>erivative1 7z.mol                                                         |
| <p>41</p>  | <p>42</p>  | <p>43</p>  | <p>44</p>  |
| Anilinobenzamide_d<br>erivative1 7y.mol                                                       | Anilinobenzamide_d<br>erivative1 7x.mol                                                       | Anilinobenzamide_d<br>erivative1 7w.mol                                                        | Anilinobenzamide_d<br>erivative1 7v.mol                                                         |
| <p>45</p>  | <p>46</p>  | <p>47</p>  | <p>48</p>  |
| Anilinobenzamide_d<br>erivative1 7u.mol                                                       | Anilinobenzamide_d<br>erivative1 7t.mol                                                       | Anilinobenzamide_d<br>erivative1 7s.mol                                                        | Anilinobenzamide_d<br>erivative1 7r.mol                                                         |

|                                                                                               |                                                                                               |                                                                                                |                                                                                                 |
|-----------------------------------------------------------------------------------------------|-----------------------------------------------------------------------------------------------|------------------------------------------------------------------------------------------------|-------------------------------------------------------------------------------------------------|
| <p>49</p> 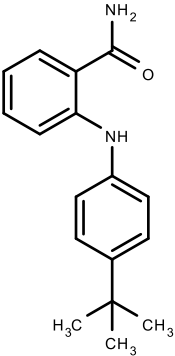   | <p>50</p>    | <p>51</p>    | <p>52</p>    |
| Anilinobenzamide_d<br>erivative1 7q.mol                                                       | Anilinobenzamide_d<br>erivative1 7o.mol                                                       | Anilinobenzamide_d<br>erivative1 7n.mol                                                        | Anilinobenzamide_d<br>erivative1 7m.mol                                                         |
| <p>53</p>    | <p>54</p>    | <p>55</p>    | <p>56</p>    |
| Anilinobenzamide_d<br>erivative1 7l.mol                                                       | Anilinobenzamide_d<br>erivative1 7k.mol                                                       | Anilinobenzamide_d<br>erivative1 7j.mol                                                        | Anilinobenzamide_d<br>erivative1 7i.mol                                                         |
| <p>57</p>  | <p>58</p>  | <p>59</p>  | <p>60</p>  |
| Anilinobenzamide_d<br>erivative1 7h.mol                                                       | Anilinobenzamide_d<br>erivative1 7g.mol                                                       | Anilinobenzamide_d<br>erivative1 7f.mol                                                        | Anilinobenzamide_d<br>erivative1 7e.mol                                                         |
| <p>61</p>  | <p>62</p>  | <p>63</p>  | <p>64</p>  |
| Anilinobenzamide_d<br>erivative1 7c.mol                                                       | Anilinobenzamide_d<br>erivative1 7b.mol                                                       | Anilinobenzamide_d<br>erivative1 7ag.mol                                                       | Anilinobenzamide_d<br>erivative1 7af.mol                                                        |

|                                                                                     |                                                                                     |                                                                                      |                                                                                       |
|-------------------------------------------------------------------------------------|-------------------------------------------------------------------------------------|--------------------------------------------------------------------------------------|---------------------------------------------------------------------------------------|
| 65                                                                                  | 66                                                                                  | 67                                                                                   | 68                                                                                    |
| 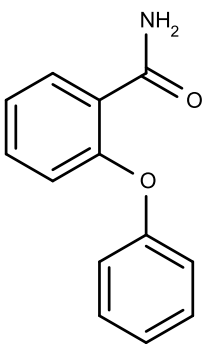    |     |     |     |
| Anilinobenzamide_d<br>erivative1 7ae.mol                                            | Anilinobenzamide_d<br>erivative1 7ad.mol                                            | Anilinobenzamide_d<br>erivative1 7ac.mol                                             | Anilinobenzamide_d<br>erivative1 7ab.mol                                              |
| 69                                                                                  | 70                                                                                  | 71                                                                                   | 72                                                                                    |
|    |    |    |    |
| Anilinobenzamide_d<br>erivative1 7aa.mol                                            | Anilinobenzamide_d<br>erivative1 7a.mol                                             | Anilinobenzamide_d<br>erivative 12.mol                                               | Anilinobenzamide_d<br>erivative 9.mol                                                 |
| 73                                                                                  | 74                                                                                  | 75                                                                                   | 76                                                                                    |
|  |  |  |  |
| Anilinobenzamide_d<br>erivative 8.mol                                               | Anilinobenzamide_d<br>erivative 7.mol                                               | Anilinobenzamide_d<br>erivative 6.mol                                                | Anilinobenzamide_d<br>erivative 5.mol                                                 |
| 77                                                                                  | 78                                                                                  | 79                                                                                   | 80                                                                                    |
|  |  |  |  |
| Anilinobenzamide_d<br>erivative 4.mol                                               | Anilinobenzamide_d<br>erivative 3.mol                                               | Anilinobenzamide_d<br>erivative 2.mol                                                | Anilinobenzamide_d<br>erivative 1.mol                                                 |

| 81                                                                                                                         | 82                                                                                                                        |  |  |
|----------------------------------------------------------------------------------------------------------------------------|---------------------------------------------------------------------------------------------------------------------------|--|--|
| 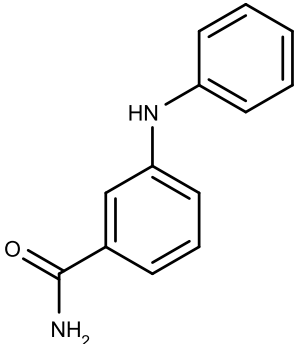<br><chem>Nc(=O)c1ccc(Nc2ccccc2)cc1</chem> | <br><chem>Nc(=O)c1ccccc1Nc2ccccc2</chem> |  |  |
| 68509298 3_anilino benzamide.mol                                                                                           | 96455 2_anilinobenzamide.mol                                                                                              |  |  |
|                                                                                                                            |                                                                                                                           |  |  |



|                                                                                                        |                                                                                                        |                                                                                                        |                                                                                                        |
|--------------------------------------------------------------------------------------------------------|--------------------------------------------------------------------------------------------------------|--------------------------------------------------------------------------------------------------------|--------------------------------------------------------------------------------------------------------|
| <p>1</p> 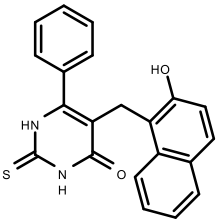             | <p>2</p>              | <p>3</p>             | <p>4</p>            |
| <p>Thiobarbiturates_d<br/>erivative1_3.mol</p>                                                         | <p>Quinolyl_pyrazolon<br/>e_derivative_22.mo<br/>l Quinolyl_pyrazol<br/>one_derivative_23.<br/>mol</p> | <p>Quinolyl_pyrazolon<br/>e_derivative_21.mo<br/>l Quinolyl_pyrazol<br/>one_derivative_22.<br/>mol</p> | <p>Quinolyl_pyrazolon<br/>e_derivative_20.mo<br/>l Quinolyl_pyrazol<br/>one_derivative_21.<br/>mol</p> |
| <p>5</p>              | <p>6</p>              | <p>7</p>             | <p>8</p>            |
| <p>Quinolyl_pyrazolon<br/>e_derivative_19.mo<br/>l Quinolyl_pyrazol<br/>one_derivative_20.<br/>mol</p> | <p>Pyrazolone_derivat<br/>ive_18.mol Quinol<br/>yl_pyrazolone_deriv<br/>ative_19.mol</p>               | <p>Pyrimidinediones_d<br/>erivative1_cambino<br/>l.mol</p>                                             | <p>Pyrimidinediones_d<br/>erivative1_10.mol</p>                                                        |
| <p>9</p>            | <p>10</p>           | <p>11</p>          | <p>12</p>         |
| <p>Pyrimidinediones_d<br/>erivative1_8.mol</p>                                                         | <p>Pyrimidinediones_d<br/>erivative1_6.mol</p>                                                         | <p>Pyrimidinediones_d<br/>erivative1_5.mol</p>                                                         | <p>Pyrimidinediones_d<br/>erivative1_4.mol</p>                                                         |
| <p>13</p>           | <p>14</p>           | <p>15</p>          | <p>16</p>         |
| <p>Pyrimidinediones_d<br/>erivative1_3.mol</p>                                                         | <p>Pyrazolone_derivat<br/>ive_17.mol Pyrazol<br/>one_derivative_18.<br/>mol</p>                        | <p>Pyrazolone_derivat<br/>ive_16.mol Pyrazol<br/>one_derivative_17.<br/>mol</p>                        | <p>Pyrazolone_derivat<br/>ive_15.mol Pyrazol<br/>one_derivative_16.<br/>mol</p>                        |

|                                                                                                                                                              |                                                                                                                                                              |                                                                                                                                                                                     |                                                                                                                                                                                      |
|--------------------------------------------------------------------------------------------------------------------------------------------------------------|--------------------------------------------------------------------------------------------------------------------------------------------------------------|-------------------------------------------------------------------------------------------------------------------------------------------------------------------------------------|--------------------------------------------------------------------------------------------------------------------------------------------------------------------------------------|
| <p>17</p> 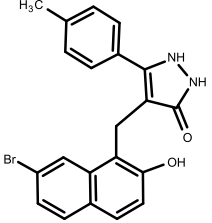 <p>Pyrazolone_derivative_14.mol Pyrazolone_derivative_15.mol</p> | <p>18</p>  <p>Pyrazolone_derivative_13.mol Pyrazolone_derivative_14.mol</p> | <p>19</p>  <p>Pyrazolone_derivative_12.mol Pyrazolone_derivative_13.mol</p>                       | <p>20</p>  <p>Pyrazolone_derivative_11.mol Pyrazolone_derivative_12.mol</p>                       |
| <p>21</p>  <p>Pyrazolone_derivative_9.mol Pyrazolone_derivative_11.mol</p>  | <p>22</p>  <p>Pyrazolone_derivative_9.mol Pyrazolone_derivative_10.mol</p>  | <p>23</p>  <p>Pyrazolone_derivative_9.mol Pyrazolone_derivative_9.mol</p>                         | <p>24</p>  <p>Pyrazolone_derivative_8.mol Pyrazolone_derivative_8.mol</p>                         |
| <p>25</p>  <p>Pyrazolone_derivative_7.mol Pyrazolone_derivative_7.mol</p> | <p>26</p>  <p>Pyrazolone_derivative_6.mol Pyrazolone_derivative_6.mol</p> | <p>27</p>  <p>Pyrazolone_derivative_5.mol Pyrazolone_derivative_5.mol</p>                       | <p>28</p>  <p>Pyrazolone_derivative_4.mol Pyrazolone_derivative_4.mol</p>                       |
| <p>29</p>  <p>Pyrazolone_derivative_3.mol Pyrazolone_derivative_3.mol</p> | <p>30</p>  <p>Pyrazolone_derivative_2.mol Pyrazolone_derivative_2.mol</p> | <p>31</p>  <p>Naphthyl_isoxazolone_derivative_25.mol Naphthyl_isoxazolone_derivative_26.mol</p> | <p>32</p>  <p>Naphthyl_isoxazolone_derivative_24.mol Naphthyl_isoxazolone_derivative_25.mol</p> |

|                                                                                                                                                                                    |                                                                                                                              |                                                                                                                               |                                                                                                                                |
|------------------------------------------------------------------------------------------------------------------------------------------------------------------------------------|------------------------------------------------------------------------------------------------------------------------------|-------------------------------------------------------------------------------------------------------------------------------|--------------------------------------------------------------------------------------------------------------------------------|
| <p>33</p> 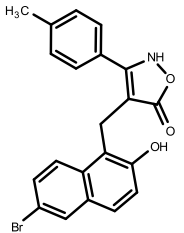 <p>Quinolyl_pyrazolone_derivative_23.mol<br/>Naphthyl_isoxazolone_derivative_24.mol</p> | <p>34</p>  <p>medda_cmpd_6j.mol</p>          | <p>35</p>  <p>MC2141_analogue1_5t.mol</p>    | <p>36</p>  <p>MC2141_analogue1_5s.mol</p>    |
| <p>37</p>  <p>MC2141_analogue1_5r.mol</p>                                                         | <p>38</p>  <p>MC2141_analogue1_5q.mol</p>   | <p>39</p>  <p>MC2141_analogue1_5p.mol</p>   | <p>40</p>  <p>MC2141_analogue1_5o.mol</p>   |
| <p>41</p>  <p>MC2141_analogue1_5n.mol</p>                                                       | <p>42</p>  <p>MC2141_analogue1_5m.mol</p> | <p>43</p>  <p>MC2141_analogue1_5l.mol</p> | <p>44</p>  <p>MC2141_analogue1_5k.mol</p> |
| <p>45</p>  <p>MC2141_analogue1_5j.mol</p>                                                       | <p>46</p>  <p>MC2141_analogue1_5i.mol</p> | <p>47</p>  <p>MC2141_analogue1_5h.mol</p> | <p>48</p>  <p>MC2141_analogue1_5g.mol</p> |

|                                                                                                                                        |                                                                                                                                        |                                                                                                                                         |                                                                                                                                         |
|----------------------------------------------------------------------------------------------------------------------------------------|----------------------------------------------------------------------------------------------------------------------------------------|-----------------------------------------------------------------------------------------------------------------------------------------|-----------------------------------------------------------------------------------------------------------------------------------------|
| <p>49</p> 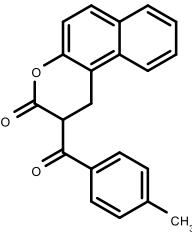 <p>MC2141_analogue1_5<br/>f.mol</p>        | <p>50</p>  <p>MC2141_analogue1_5<br/>e.mol</p>        | <p>51</p>  <p>MC2141_analogue1_5<br/>d.mol</p>        | <p>52</p>  <p>MC2141_analogue1_5<br/>c.mol</p>       |
| <p>53</p>  <p>MC2141_analogue1_5<br/>b.mol</p>        | <p>54</p>  <p>MC2141_analogue1_5<br/>a.mol</p>        | <p>55</p>  <p>MC2141.mol</p>                          | <p>56</p>  <p>Cambinol_derivativ<br/>e1_13d.mol</p>  |
| <p>57</p>  <p>Cambinol_derivativ<br/>e1_13c.mol</p> | <p>58</p>  <p>Cambinol_derivativ<br/>e1_13b.mol</p> | <p>59</p>  <p>Cambinol_derivativ<br/>e1_13a.mol</p> | <p>60</p>  <p>Cambinol_derivativ<br/>e1_12.mol</p> |
| <p>61</p>  <p>Cambinol_analogue1<br/>_6q.mol</p>    | <p>62</p>  <p>Cambinol_analogue1<br/>_6p.mol</p>    | <p>63</p>  <p>Cambinol_analogue1<br/>_6o.mol</p>    | <p>64</p>  <p>Cambinol_analogue1<br/>_6n.mol</p>   |

|                                                                                                                                |                                                                                                                                |                                                                                                                                 |                                                                                                                                  |
|--------------------------------------------------------------------------------------------------------------------------------|--------------------------------------------------------------------------------------------------------------------------------|---------------------------------------------------------------------------------------------------------------------------------|----------------------------------------------------------------------------------------------------------------------------------|
| <p>65</p> 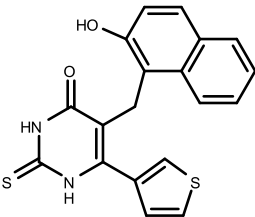 <p>Cambinol_analogue1_6m.mol</p>   | <p>66</p>  <p>Cambinol_analogue1_6l.mol</p>   | <p>67</p>  <p>Cambinol_analogue1_6k.mol</p>   | <p>68</p>  <p>Cambinol_analogue1_6j.mol</p>   |
| <p>69</p>  <p>Cambinol_analogue1_6i.mol</p>   | <p>70</p>  <p>Cambinol_analogue1_6h.mol</p>   | <p>71</p>  <p>Cambinol_analogue1_6g.mol</p>   | <p>72</p>  <p>Cambinol_analogue1_6f.mol</p>   |
| <p>73</p>  <p>Cambinol_analogue1_6e.mol</p> | <p>74</p>  <p>Cambinol_analogue1_6d.mol</p> | <p>75</p>  <p>Cambinol_analogue1_6c.mol</p> | <p>76</p>  <p>Cambinol_analogue1_6b.mol</p> |
| <p>77</p>  <p>Cambinol_analogue1_6a.mol</p> | <p>78</p>  <p>cambinol.mol</p>              | <p>79</p>  <p>6j cambinol analog_6j.mol</p> | <p>80</p>  <p>6h cambinol analog_6h.mol</p> |

81

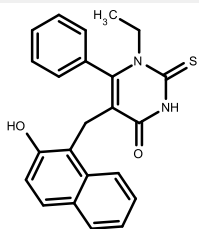

```
6f cambinol analog
  6f.mol
```

82

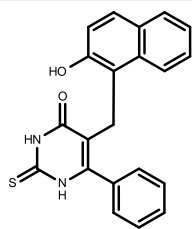Benzodeazaoxaflavins\_derivative1\_Cam  
binol.mol

83

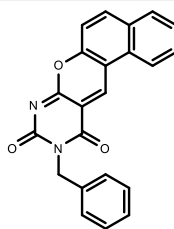

Benzodeazaoxaflavins\_derivative1\_2g.mol
